# Supplementary material for: Effect of Chitosan Coating for Efficient Encapsulation and Improved Stability under Loading Preparation and Storage Conditions of Bacillus Lipopeptides
Source: MDPI journal article supplement (doi:10.3390/nano12234189), 2022-11-25
Supplement: s1 [file s1]

Supplementary

# Effect of Chitosan Coating for Efficient Encapsulation and Improved Stability under Loading Preparation and Storage Conditions of *Bacillus* Lipopeptides

Beom Ryong Kang <sup>1,\*</sup>, Joon Seong Park <sup>2</sup>, Gwang Rok Ryu <sup>3</sup>, Woo-Jin Jung <sup>1,3</sup>, Jun-Seok Choi <sup>3</sup> and Hye-Min Shin <sup>3</sup>

<sup>1</sup> Institute of Environmentally-Friendly Agriculture, Chonnam National University, Gwangju 61186, Republic of Korea

<sup>2</sup> Gwangju Metropolitan City Agricultural Extension Center, Gwangju Metropolitan City 61945, Republic of Korea

<sup>3</sup> Department of Agricultural Chemistry, Chonnam National University, Gwangju 61186, Republic of Korea

\* Correspondence: brkang@jnu.ac.kr

**Table S1.** MRM transition parameters of analytes in LC-MS/MS.

| Compound  | Precursor ion<br>(m/z) | Product ion<br>(m/z) | DP <sup>b)</sup><br>(V) | EP <sup>c)</sup><br>(V) | CE <sup>d)</sup><br>(V) | Ionization<br>mode            |
|-----------|------------------------|----------------------|-------------------------|-------------------------|-------------------------|-------------------------------|
| Iturin A  | 1043.47                | 70.1 <sup>a)</sup>   | 161.0                   | 6.0                     | 177.0                   | Positive<br>ESI <sup>e)</sup> |
|           |                        | 183.9                | 161.0                   | 14.0                    | 107.0                   |                               |
| Surfactin | 1036.59                | 86.0 <sup>a)</sup>   | 196.0                   | 6.0                     | 119.0                   | Positive<br>ESI <sup>e)</sup> |
|           |                        | 685.5                | 196.0                   | 14.0                    | 45.0                    |                               |
| Fengycin  | 732.26                 | 70.1                 | 121.0                   | 6.0                     | 133.0                   | Positive<br>ESI <sup>e)</sup> |
|           |                        | 84.0                 | 121.0                   | 14.0                    | 121.0                   |                               |

<sup>a)</sup> Quantitation ion, <sup>b)</sup> Declustering potential, <sup>c)</sup> Entrance potential, <sup>d)</sup> Collision energy <sup>e)</sup> Electrospray ionization.
